# Supplementary material for: Yield Predictive Worth of Pre-Flowering and Post-Flowering Indicators of Nitrogen Economy in High Yielding Winter Wheat
Source: MDPI journal article supplement (doi:10.3390/agronomy13010122), 2022-12-30
Supplement: s1 [file s1]

Archive with 1 entries (1 files):
- agronomy-2117733-supplementary.pdf
