# Supplementary material for: Yield Predictive Worth of Pre-Flowering and Post-Flowering Indicators of Nitrogen Economy in High Yielding Winter Wheat
Source: MDPI journal article supplement (doi:10.3390/agronomy13010122), 2022-12-30
Supplement: s1 [file s1 › agronomy-2117733-supplementary.pdf]

## Supplementary Materials

### Figures

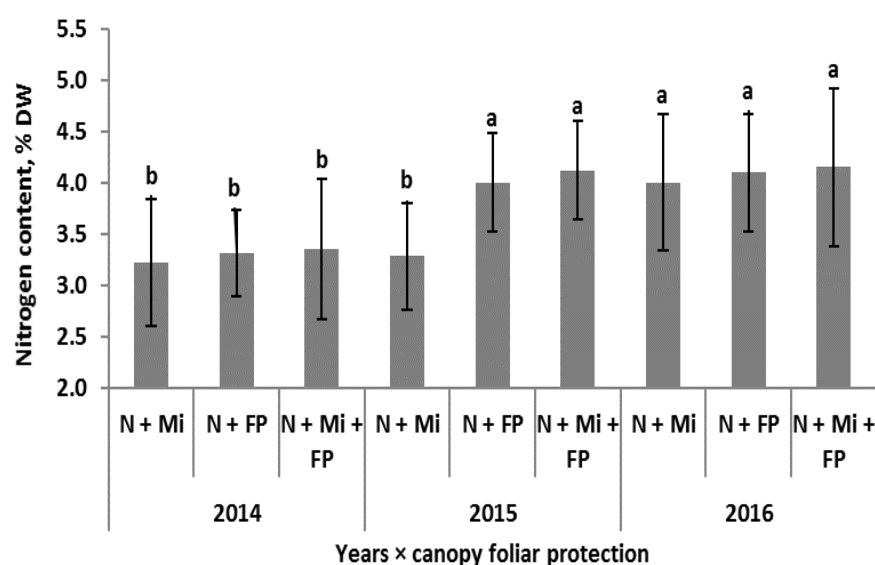

**Figure S1.** Effect of the foliar method of winter wheat canopy protection on the content of nitrogen at the beginning of the stem elongation phase in consecutive years of study. <sup>a</sup>Similar letters means a lack of significant differences using Tukeys' test. The vertical bar in the column refers to the standard deviation value.

Legend: N + Mi – nitrogen plus foliar applied micronutrients; N + FP – nitrogen + foliar applied fungicides; N + Mi + FP – nitrogen plus foliar applied micronutrients and fungicides.

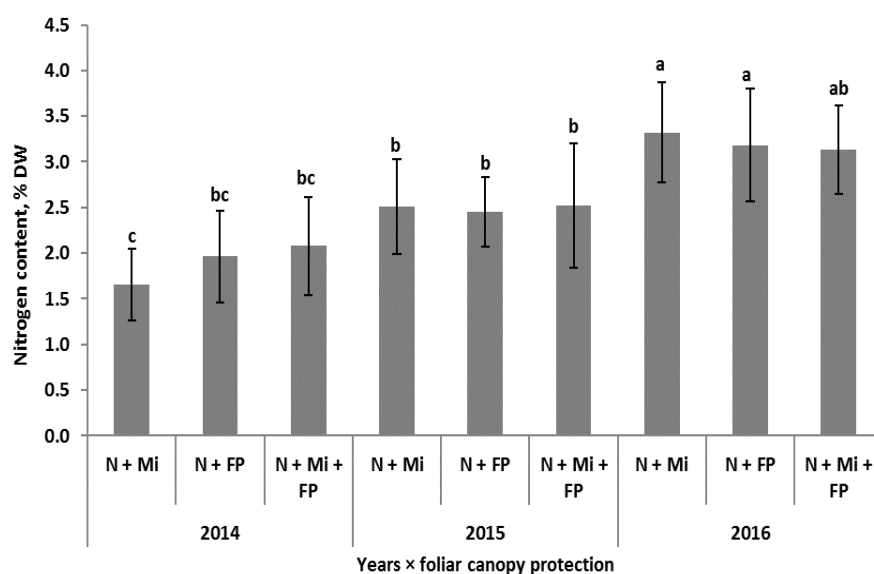

**Figure S2.** Effect of the foliar method of winter wheat canopy protection on the content of nitrogen in the flag leaf in consecutive years of study. <sup>a</sup>Similar letters means a lack of significant differences using Tukeys' test.

Legend: N + Mi – nitrogen plus foliar applied micronutrients; N + FP – nitrogen plus foliar applied fungicides; N + Mi + FP – nitrogen plus foliar applied micronutrients and fungicides. The vertical bar in the column refers to the standard deviation value.

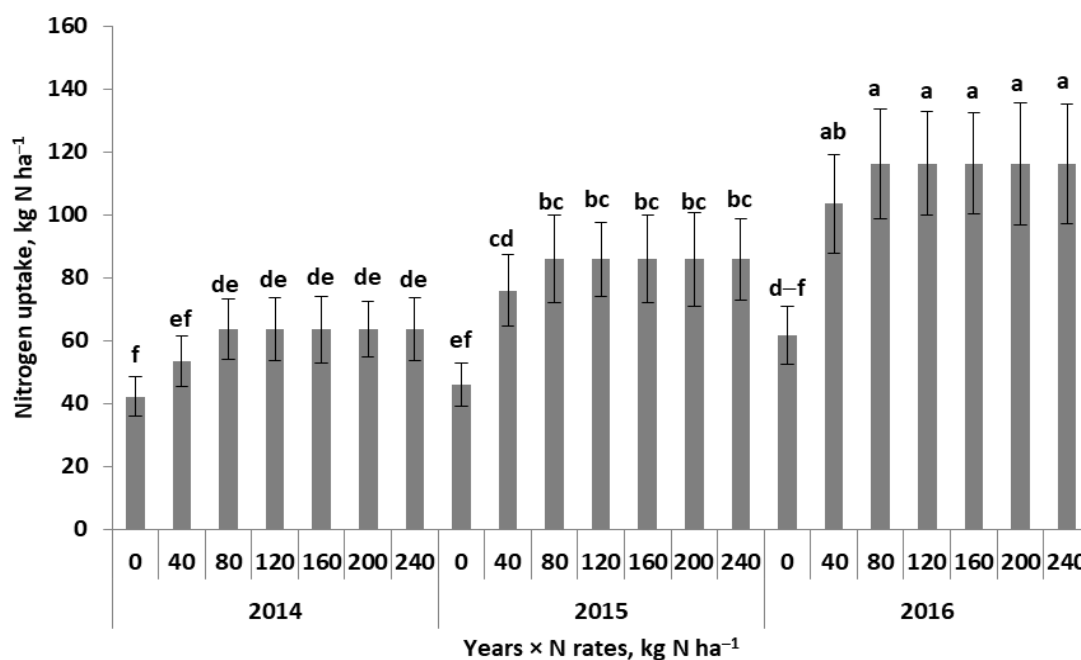

**Figure S3.** Effect of increasing nitrogen rates on the amount of accumulated nitrogen in winter wheat at the beginning of the stem elongation phase in subsequent years of study. <sup>a</sup>Similar letters means a lack of significant differences using Tukey's test. The vertical bar in the column refers to the standard deviation value.

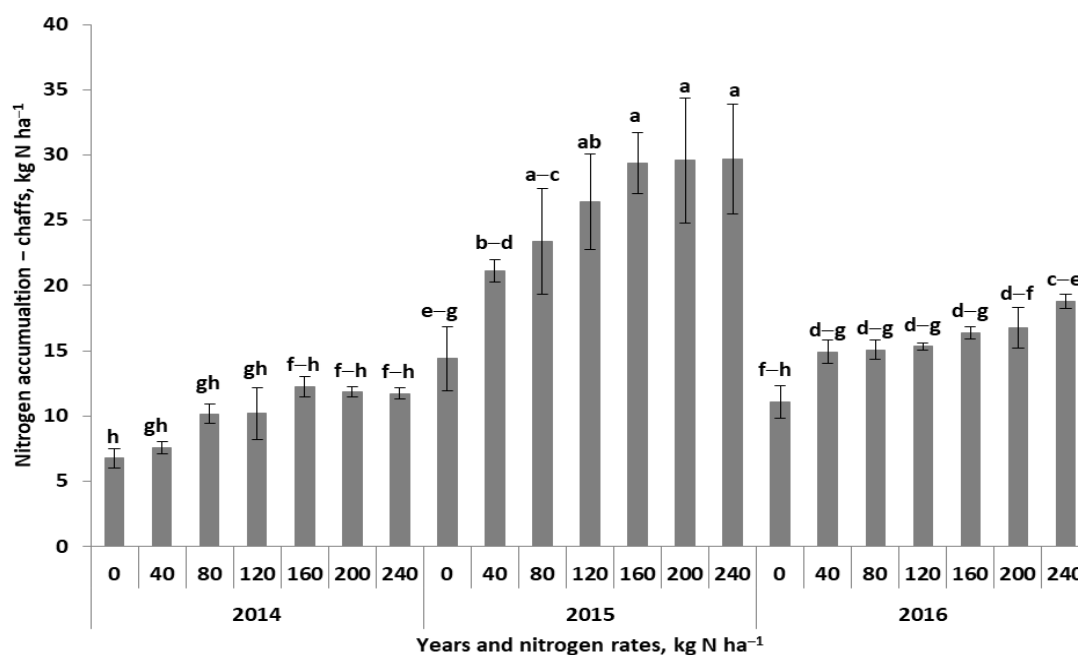

**Figure S4.** Effect of increasing nitrogen rates on the amount of accumulated nitrogen in chaffs of winter wheat at maturity in subsequent years of study. <sup>a</sup>Similar letters means a lack of significant differences using Tukey's test. The vertical bar in the column refers to the standard deviation value.

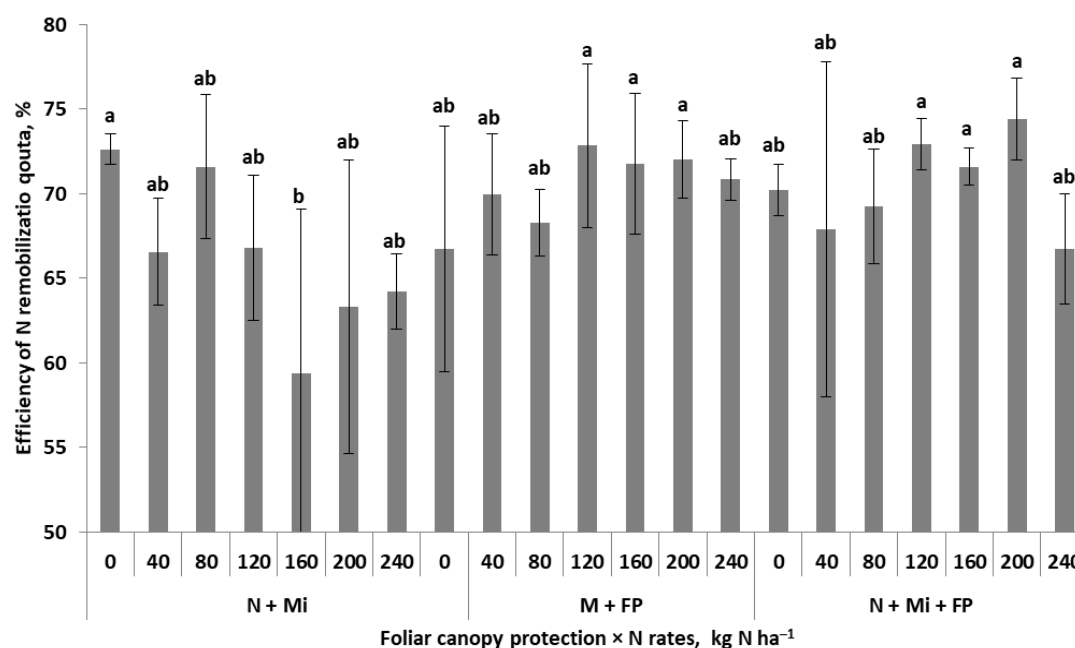

**Figure S5.** Effect of interaction of foliar protection of winter wheat canopy and nitrogen rates on the efficiency of the remobilized nitrogen during the grain filling period. <sup>a</sup>Similar letters means a lack of significant differences using Tukey's test. The vertical bar in the column refers to the standard deviation value.

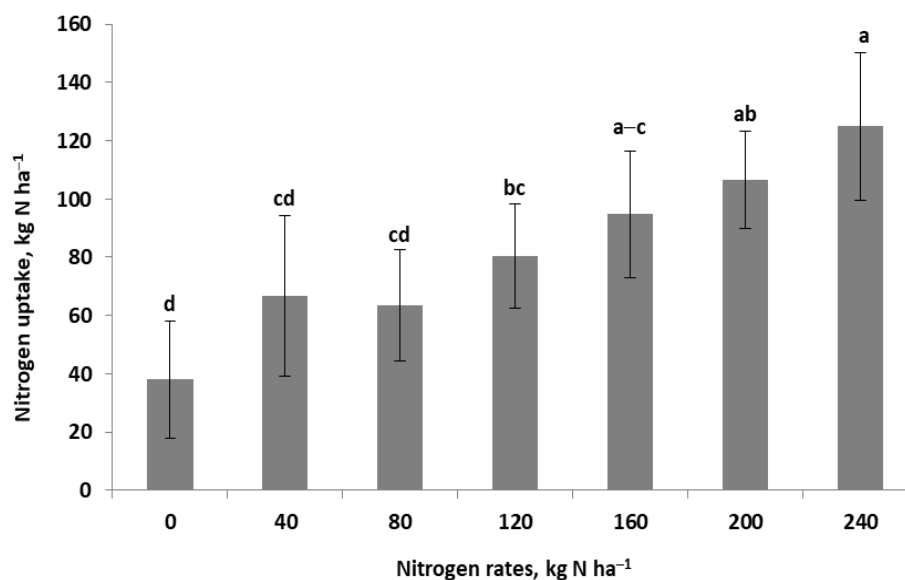

**Figure S6.** The effect of nitrogen rates on the postflowering N uptake from the soil; averaged for 2014 and 2015 growing seasons. The vertical bar in the column refers to the standard deviation value. The vertical bar in the column refers to the standard deviation value.

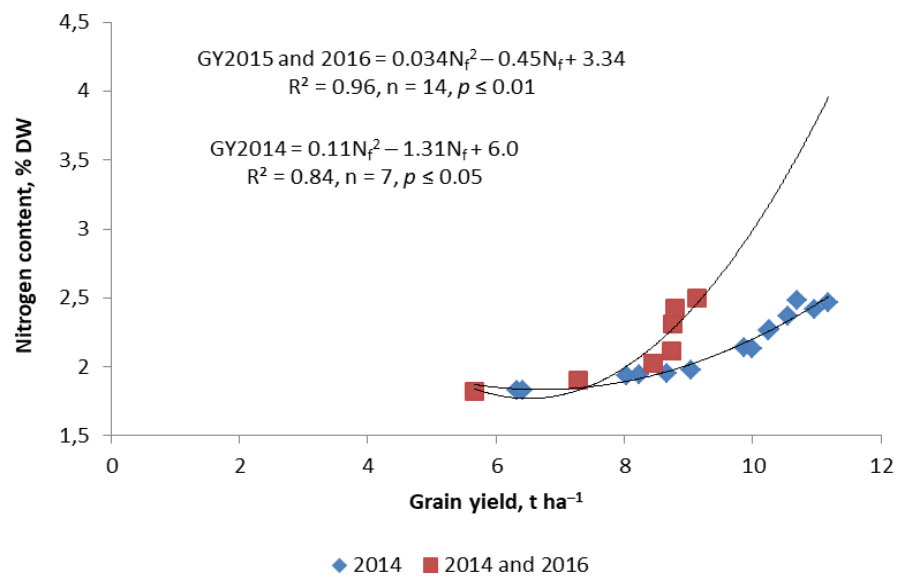

**Figure S7.** The relationship between the grain yield of winter wheat and the content of nitrogen in grain.
